# Supplementary material for: Genetic Variants of lncRNA MALAT1 Exert Diverse Impacts on the Risk and Clinicopathologic Characteristics of Patients with Hepatocellular Carcinoma
Source: J Clin Med. 2019 Sep 6;8(9):1406. doi: 10.3390/jcm8091406 (PMC6780489; doi:10.3390/jcm8091406)
Supplement: Supplementary file 1 [file jcm-08-01406-s001.pdf]

## Supplementary data

**Table 1.** Odds ratio (OR) and 95% confidence interval (CI) of clinical status and *MALAT1* genotypic frequencies in 394 hepatocellular carcinoma patients.

| Variable                                    | Genotypic frequencies |             |             |
|---------------------------------------------|-----------------------|-------------|-------------|
|                                             | rs3200401             | rs619586    | rs1194338   |
| Clinical Stage (Stage I/II vs Stage III/IV) | $p = 0.497$           | $p = 0.766$ | $p = 0.494$ |
| Tumor size ( $\leq T2$ vs $>T2$ )           | $p = 0.596$           | $p = 0.807$ | $p = 0.515$ |
| Lymph node metastasis (No vs Yes)           | $p = 0.541$           | $p = 0.461$ | $p = 0.888$ |
| Distant metastasis (No vs Yes)              | $p = 0.513$           | $p = 0.493$ | $p = 0.541$ |
| Vascular invasion (No vs Yes)               | $p = 0.290$           | $p = 0.728$ | $p = 0.100$ |
| Child-Pugh grade (A vs B or C)              | $p = 0.914$           | $p = 0.489$ | $p = 0.083$ |
| HBsAg (Negative vs Positive)                | $p = 0.162$           | $p = 0.388$ | $p = 0.295$ |
| Anti-HCV (Negative vs Positive)             | $p = 0.639$           | $p = 0.600$ | $p = 0.885$ |
| Liver cirrhosis (Negative vs Positive)      | $p = 0.194$           | $p = 0.287$ | $p = 0.471$ |

**Table 2.** Distribution frequency of the clinical status and for *MALAT1* SNPs frequencies in hepatocellular carcinoma patients with stratified by gender.

| Variable                                    | Male        |             |             | Female      |             |               |
|---------------------------------------------|-------------|-------------|-------------|-------------|-------------|---------------|
|                                             | rs3200401   | rs619586    | rs1194338   | rs3200401   | rs619586    | rs1194338     |
| Clinical Stage (Stage I/II vs Stage III/IV) | $p = 0.539$ | $p = 0.383$ | $p = 0.745$ | $p = 0.715$ | $p = 0.509$ | $p = 0.431$   |
| Tumor size ( $\leq T2$ vs. $> T2$ )         | $p = 0.603$ | $p = 0.352$ | $p = 0.955$ | $p = 0.770$ | $p = 0.415$ | $p = 0.168$   |
| Lymph node metastasis (No vs Yes)           | $p = 0.746$ | NA          | $p = 0.360$ | NA          | $p = 0.301$ | NA            |
| Distant metastasis (No vs Yes)              | $p = 0.617$ | $p = 0.411$ | $p = 0.232$ | $p = 0.630$ | $p = 0.954$ | $p = 0.419$   |
| Vascular invasion (No vs Yes)               | $p = 0.248$ | $p = 0.384$ | $p = 0.534$ | $p = 0.896$ | $p = 0.546$ | $p = 0.049^*$ |
| Child-Pugh grade (A vs B or C)              | $p = 0.728$ | $p = 0.247$ | $p = 0.096$ | $p = 0.444$ | $p = 0.668$ | $p = 0.507$   |
| HBsAg (Negative vs Positive)                | $p = 0.194$ | $p = 0.254$ | $p = 0.240$ | $p = 0.766$ | $p = 0.698$ | $p = 0.995$   |
| Anti-HCV (Negative vs Positive)             | $p = 0.497$ | $p = 0.565$ | $p = 0.961$ | $p = 0.670$ | $p = 0.732$ | $p = 0.929$   |
| Liver cirrhosis (Negative vs Positive)      | $p = 0.431$ | $p = 0.278$ | $p = 0.715$ | $p = 0.198$ | $p = 0.707$ | $p = 0.414$   |

\*  $p$  value  $< 0.05$  as statistically significant. NA: not applicable.

**Table 3.** Distribution frequency of the clinical status and for *MALAT1* SNPs frequencies in hepatocellular carcinoma patients with stratified by smoking status.

| Variable                                    | Smokers       |             |               | Non-smokers |             |             |
|---------------------------------------------|---------------|-------------|---------------|-------------|-------------|-------------|
|                                             | rs3200401     | rs619586    | rs1194338     | rs3200401   | rs619586    | rs1194338   |
| Clinical Stage (Stage I/II vs Stage III/IV) | $p = 0.353$   | $p = 0.945$ | $p = 0.311$   | $p = 0.895$ | $p = 0.740$ | $p = 0.093$ |
| Tumor size ( $\leq T2$ vs. $>T2$ )          | $p = 0.353$   | $p = 0.945$ | $p = 0.311$   | $p = 0.963$ | $p = 0.788$ | $p = 0.101$ |
| Lymph node metastasis (No vs Yes)           | NA            | NA          | $p = 0.962$   | $p = 0.516$ | $p = 0.879$ | $p = 0.892$ |
| Distant metastasis (No vs Yes)              | $p = 0.251$   | NA          | $p = 0.498$   | $p = 0.889$ | $p = 0.979$ | $p = 0.791$ |
| Vascular invasion (No vs Yes)               | $p = 0.371$   | $p = 0.551$ | $p = 0.101$   | $p = 0.524$ | $p = 0.352$ | $p = 0.428$ |
| Child-Pugh grade (A vs B or C)              | $p = 0.860$   | $p = 0.192$ | $p = 0.036^*$ | $p = 0.770$ | $p = 0.867$ | $p = 0.600$ |
| HBsAg (Negative vs Positive)                | $p = 0.034^*$ | $p = 0.487$ | $p = 0.761$   | $p = 0.961$ | $p = 0.583$ | $p = 0.273$ |
| Anti-HCV (Negative vs Positive)             | $p = 0.405$   | $p = 0.300$ | $p = 0.541$   | $p = 0.937$ | $p = 0.870$ | $p = 0.504$ |
| Liver cirrhosis (Negative vs Positive)      | $p = 0.141$   | $p = 0.626$ | $p = 0.884$   | $p = 0.651$ | $p = 0.333$ | $p = 0.298$ |

\*  $p$  value  $< 0.05$  as statistically significant. NA: not applicable.

**Table 4.** Association of *MALAT1* genotypic frequencies with hepatocellular carcinoma laboratory findings.

| Characteristic              | AFP <sup>a</sup> (ng/mL) | AST <sup>a</sup> (IU/L) | ALT <sup>a</sup> (IU/L) | AST/ALT <sup>a</sup> ratio |
|-----------------------------|--------------------------|-------------------------|-------------------------|----------------------------|
| <b>rs3200401</b>            |                          |                         |                         |                            |
| CC                          | 3333.6 ± 1009.4          | 100.5 ± 10.7            | 233.9 ± 139.5           | 1.5 ± 0.1                  |
| CT + TT                     | 2076.5 ± 942.5           | 151.7 ± 34.3            | 113.3 ± 22              | 1.4 ± 0.1                  |
| <i>p</i> value              | 0.136                    | 0.268                   | 0.822                   | 0.624                      |
| <i>p</i> value <sup>b</sup> | 0.280                    | 0.040*                  | 0.624                   | 0.556                      |
| <b>rs619586</b>             |                          |                         |                         |                            |
| AA                          | 3436.3 ± 884.3           | 120.1 ± 14.1            | 216.9 ± 111.5           | 1.5 ± 0.1                  |
| AG + GG                     | 230.7 ± 76               | 104 ± 40.1              | 74.6 ± 10.8             | 1.4 ± 0.1                  |
| <i>p</i> value              | 0.116                    | 0.085                   | 0.946                   | 0.190                      |
| <i>p</i> value <sup>b</sup> | 0.214                    | 0.479                   | 0.507                   | 0.529                      |
| <b>rs1194338</b>            |                          |                         |                         |                            |
| CC                          | 3059.6 ± 1241.7          | 97.6 ± 12.7             | 312.1 ± 213.2           | 1.5 ± 0.1                  |
| CA + AA                     | 2804.1 ± 904.3           | 132.9 ± 21.8            | 102.1 ± 14.4            | 1.4 ± 0.1                  |
| <i>p</i> value              | 0.962                    | 0.344                   | 0.375                   | 0.803                      |
| <i>p</i> value <sup>b</sup> | 0.680                    | 0.158                   | 0.261                   | 0.532                      |

Mann-Whitney U-test was used between two groups. Multiple linear regression was used to adjust for age, gender, cigarette smoking, and alcohol consumption. <sup>a</sup> Mean ± standard error. <sup>b</sup> Adjusted for age, gender, cigarette smoking, and alcohol consumption. AFP, alpha-fetoprotein; AST, aspartate aminotransferase; ALT, alanine aminotransferase.

**Table S5.** Odds ratio (OR) and 95% confidence interval (CI) of clinical status and *MALAT1* genotypic frequencies in hepatocellular carcinoma patients with hepatitis B virus infection (*n* = 167)

| Variable                                    | Genotypic frequencies |                  |                  |
|---------------------------------------------|-----------------------|------------------|------------------|
|                                             | rs3200401             | rs619586         | rs1194338        |
| Clinical Stage (Stage I/II vs Stage III/IV) | <i>p</i> = 0.615      | <i>p</i> = 0.695 | <i>p</i> = 0.426 |
| Tumor size (≤ T2 vs. > T2)                  | <i>p</i> = 0.581      | <i>p</i> = 0.542 | <i>p</i> = 0.501 |
| Lymph node metastasis (No vs Yes)           | <i>p</i> = 0.616      | <i>p</i> = 0.999 | <i>p</i> = 0.396 |
| Distant metastasis (No vs Yes)              | <i>p</i> = 0.473      | <i>p</i> = 0.877 | <i>p</i> = 0.848 |
| Vascular invasion (No vs Yes)               | <i>p</i> = 0.550      | <i>p</i> = 0.566 | <i>p</i> = 0.228 |
| Child-Pugh grade (A vs B or C)              | <i>p</i> = 0.865      | <i>p</i> = 0.086 | <i>p</i> = 0.107 |
| Anti-HCV (Negative vs Positive)             | <i>p</i> = 0.978      | <i>p</i> = 0.614 | <i>p</i> = 0.951 |
| Liver cirrhosis (Negative vs Positive)      | <i>p</i> = 0.108      | <i>p</i> = 0.284 | <i>p</i> = 0.312 |

**Table 6.** Odds ratio (OR) and 95% confidence interval (CI) of clinical status and *MALAT1* genotypic frequencies in hepatocellular carcinoma patients with hepatitis C virus infection (*n* = 178).

| Variable                                    | Genotypic frequencies |                  |                  |
|---------------------------------------------|-----------------------|------------------|------------------|
|                                             | rs3200401             | rs619586         | rs1194338        |
| Clinical Stage (Stage I/II vs Stage III/IV) | <i>p</i> = 0.487      | <i>p</i> = 0.594 | <i>p</i> = 0.912 |
| Tumor size (≤ T2 vs > T2)                   | <i>p</i> = 0.849      | <i>p</i> = 0.644 | <i>p</i> = 0.750 |
| Lymph node metastasis (No vs Yes)           | NA                    | NA               | <i>p</i> = 0.452 |
| Distant metastasis (No vs Yes)              | NA                    | NA               | <i>p</i> = 0.452 |
| Vascular invasion (No vs Yes)               | <i>p</i> = 0.322      | <i>p</i> = 0.170 | <i>p</i> = 0.497 |
| Child-Pugh grade (A vs B or C)              | <i>p</i> = 0.649      | <i>p</i> = 0.476 | <i>p</i> = 0.998 |
| HBsAg (Negative vs Positive)                | <i>p</i> = 0.634      | <i>p</i> = 0.554 | <i>p</i> = 0.702 |
| Liver cirrhosis (Negative vs Positive)      | <i>p</i> = 0.435      | <i>p</i> = 0.761 | <i>p</i> = 0.189 |

NA: not applicable.
